# Supplementary material for: Effect of a novel food rich in miraculin on the intestinal microbiome of malnourished patients with cancer and dysgeusia
Source: bioRxiv or medRxiv preprint supplement (doi:10.1101/2024.08.20.24312287), 2024-08-22
Supplement: Supplementary file [file media-1.pdf]

**Table S1.** Nutritional composition of the food supplement enriched in miraculin (DMB) and placebo

|                          |      | Standard dose of<br>DMB<br>(150 mg DMB +<br>150 mg strawberry<br>freeze-dried) | High dose of<br>DMB<br>(300 mg DMB) | Placebo (300 mg<br>strawberry freeze-<br>dried) |
|--------------------------|------|--------------------------------------------------------------------------------|-------------------------------------|-------------------------------------------------|
| Energy                   | kcal | 0.99                                                                           | 1                                   | 0.97                                            |
| Carbohydrates            | mg   | 194                                                                            | 234                                 | 154                                             |
| Sugars                   | mg   | 156                                                                            | 162                                 | 150                                             |
| Fiber                    | mg   | 26                                                                             | 6                                   | 46                                              |
| Proteins                 | mg   | 20                                                                             | 15                                  | 24                                              |
| Lipids                   | mg   | 9                                                                              | 5                                   | 12                                              |
| Saturated fatty<br>acids | mg   | 2                                                                              | 2                                   | 1                                               |
| Sodium<br>chloride       | mg   | 0.1                                                                            | 0.1                                 | 0.03                                            |
| Humidity                 | mg   | 4                                                                              | 4                                   | 5                                               |
| Ash                      | mg   | 12                                                                             | 14                                  | 15                                              |
| Miraculin                | mg   | 2,8                                                                            | 5,6                                 | 0                                               |

Nutritional composition provided by Medicinal Gardens, S.L.
